# Supplementary material for: Factors controlling spatiotemporal variability of soil carbon accumulation and stock estimates in a tidal salt marsh
Source: Copernicus journal article supplement (doi:10.5194/egusphere-2023-2627), 2023-12-01
Supplement: Supplementary file 1 [file egusphere-2023-2627-supplement.pdf]

**Factors controlling spatiotemporal variability of soil carbon accumulation and stock estimates in a  
tidal salt marsh**

Sean Fettrow, Andrew Wozniak, Holly Michael, and Angelia Seyfferth

**Supplemental Table 1** The indices and peaks for UV-VIS/ EMMs analysis used in this study to determine molecular properties and source of DOC

| <b>Indices</b>                 | <b>Calculation</b>                                                                               | <b>Characterization Information</b>                                                | <b>Original Source</b> |
|--------------------------------|--------------------------------------------------------------------------------------------------|------------------------------------------------------------------------------------|------------------------|
| Abs <sub>254</sub>             | Absorption at 254 nm                                                                             | Related to total CDOM concentration                                                |                        |
| SUVA <sub>254</sub>            | Absorption at 254 nm divide by DOC concentration                                                 | Higher number is associated with greater aromaticity                               | Weishaar et al. 2003   |
| S <sub>r</sub>                 | Slope from S <sub>275-295</sub> divided by slope from S <sub>350-400</sub>                       | Higher values indicate marine influence                                            | Helms et al. (2008)    |
| E <sub>2</sub> :E <sub>3</sub> | Slope from S <sub>250-365</sub>                                                                  | Inversely related to DOM molecular weight                                          | Helms et al. (2008)    |
| Coble A                        | Ex260/ Em450                                                                                     | Terrestrial-like source, soil-humics                                               | Cory et al 2010        |
| Coble C                        | Ex340/ em450                                                                                     | Terrestrial-like source, soil-humics                                               | Baker et al 2008       |
| HIX                            | Area under em spectra from 435-480 m, divided by peak area 300-345 nm & 435-480 nm, at ex 254 nm | Higher values correspond with increased humic substances or degree of humification | Ohno (2002)            |
| BIX                            | Ratio of em intensity at 380 nm divided by 430 nm at excitation 310 nm                           | Higher values correspond with microbially-derived CDOM                             | Huguet et al 2009      |

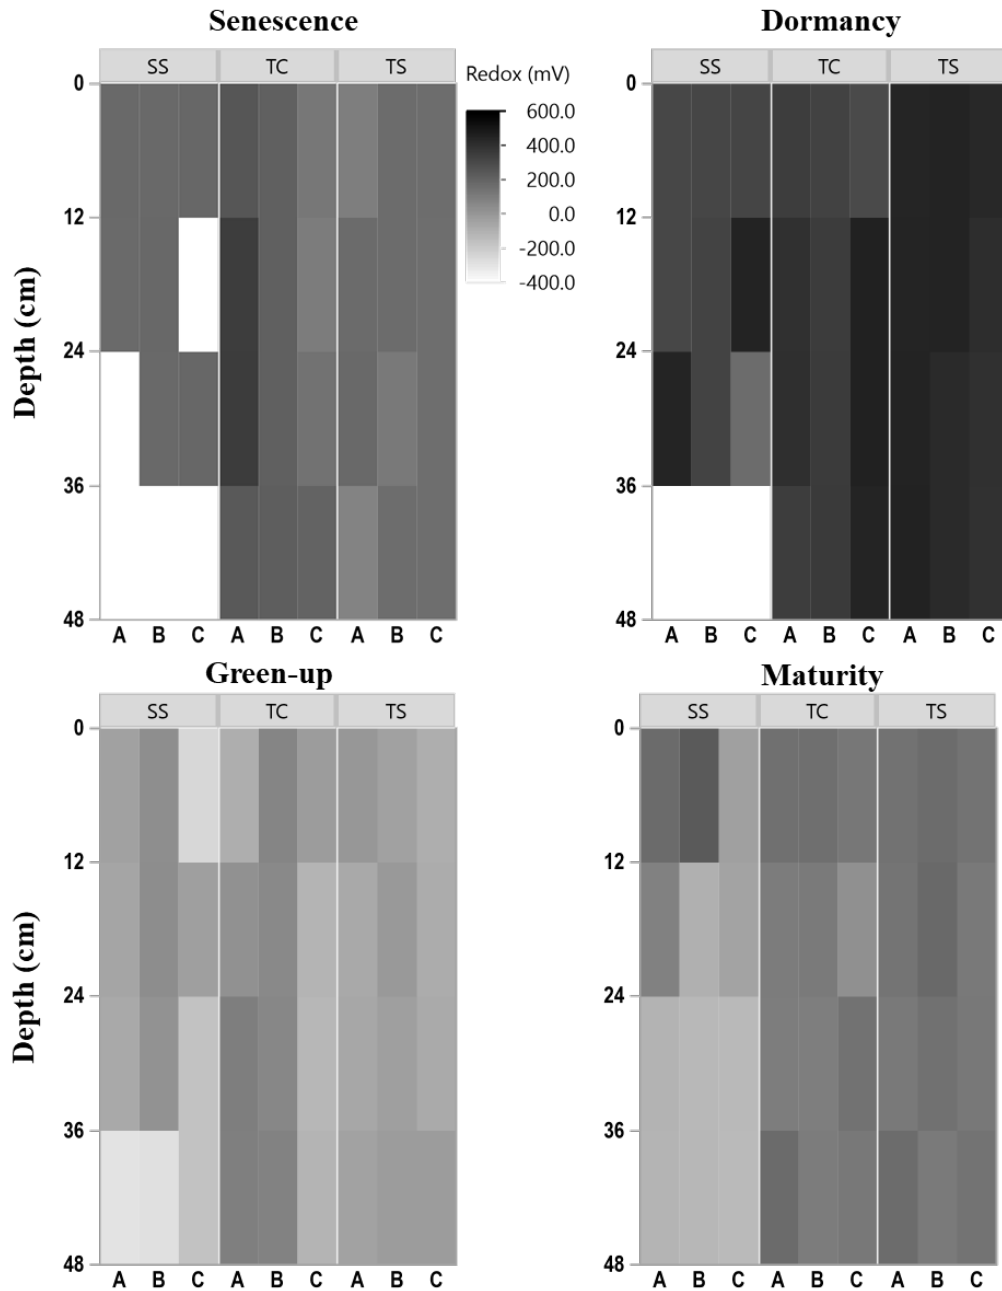

**Supplemental Fig. 2** Heat maps of porewater redox with depth at the three subsites (SS, TC, and TS), four phenology phases, and for each replicate core (A (closest to channel), B, and C (farthest from channel)). No measurement was able to be obtained for some 12-cm sections as shown by white rectangles.
